# Supplementary material for: Occult polyclonality of preclinical pancreatic cancer models drives in vitro evolution
Source: PubMed Central journal article supplement (PMC9233687; doi:10.1038/s41467-022-31376-3), 2022-06-25

**Supplementary Fig. 1) Phenotype mapping and cladogram analysis of cell lines to measure evolutionary relatedness based on scRNAseq data. a) Phenotype mapping as a function of relative diffusion space (indicated by heatmap legend) of all cell lines. b) Cladogram depiction of diffusion space between cell lines. The x-axis indicates the sample names and y-axis indicates the phenotypic distances.**

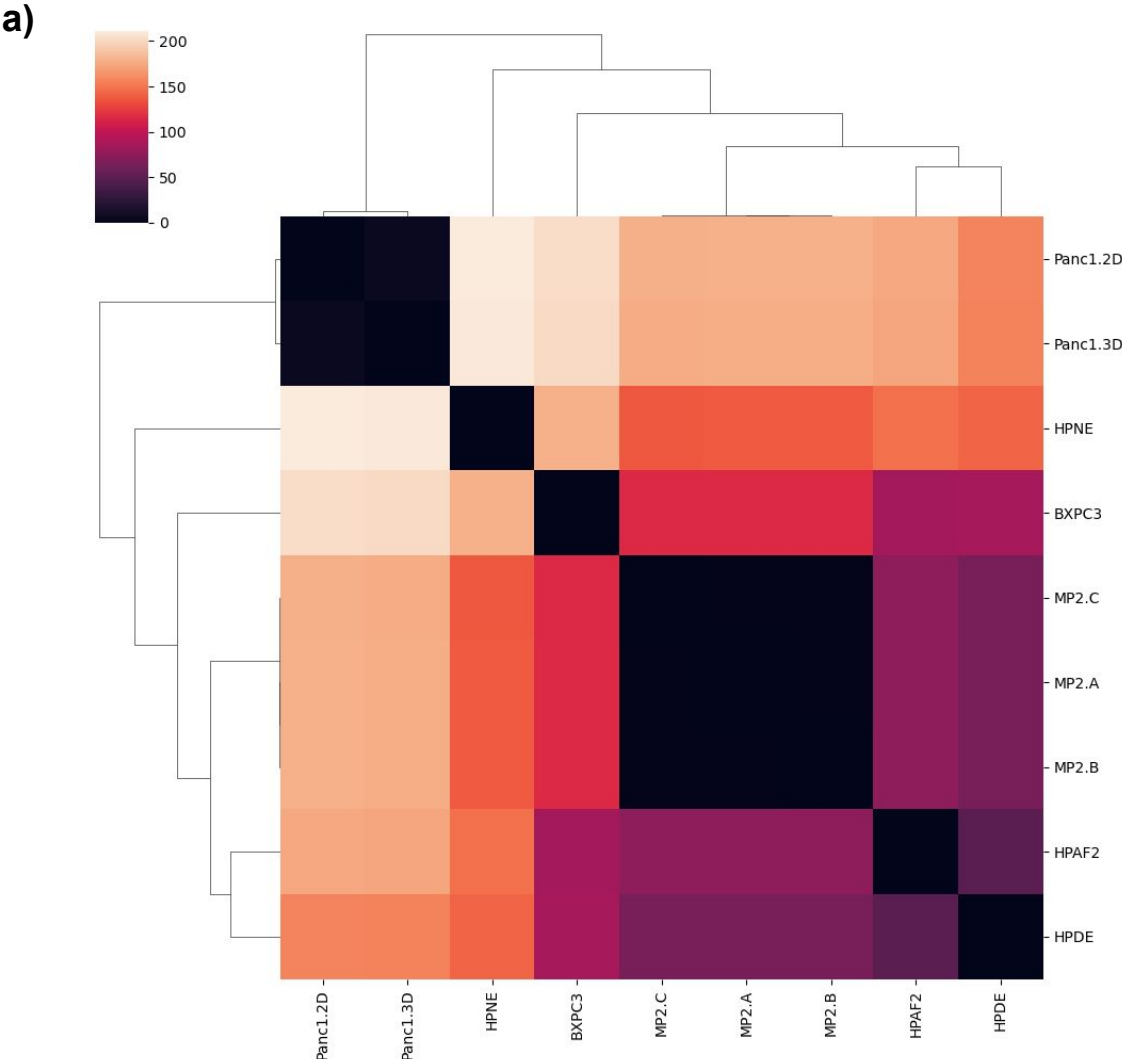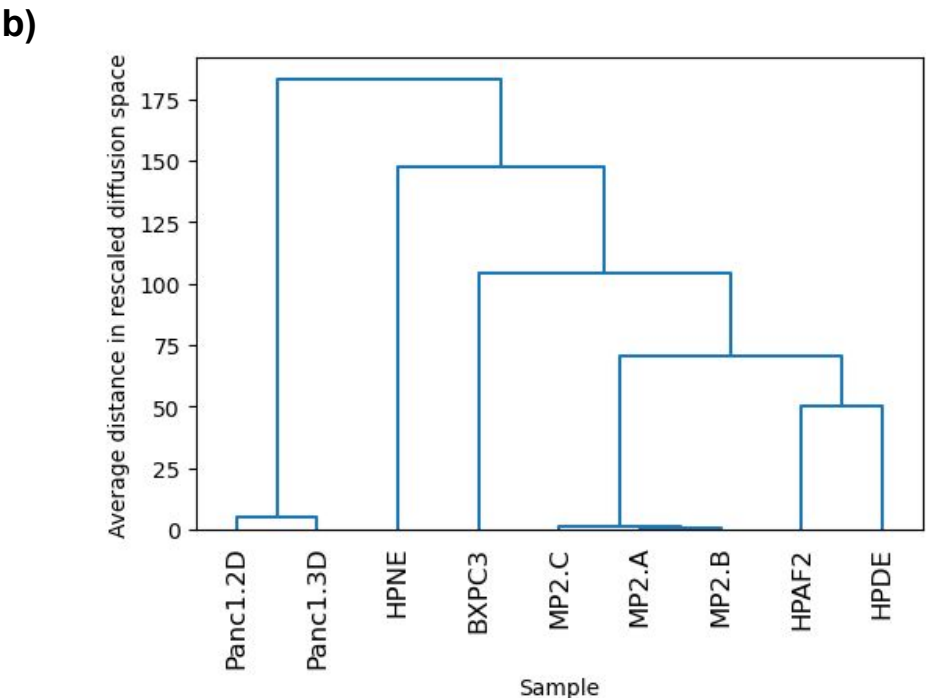

**Supplementary Fig. 2) scCNV profiles of PDAC cell lines reveal subclonal heterogeneity.** For all samples depicted here (a-c), columns indicate chromosomes (numbers labeled in gray and white), rows indicate individual cells organized into clonal clades. Phylogeny determined using 10x Genomics scCNV analysis software.

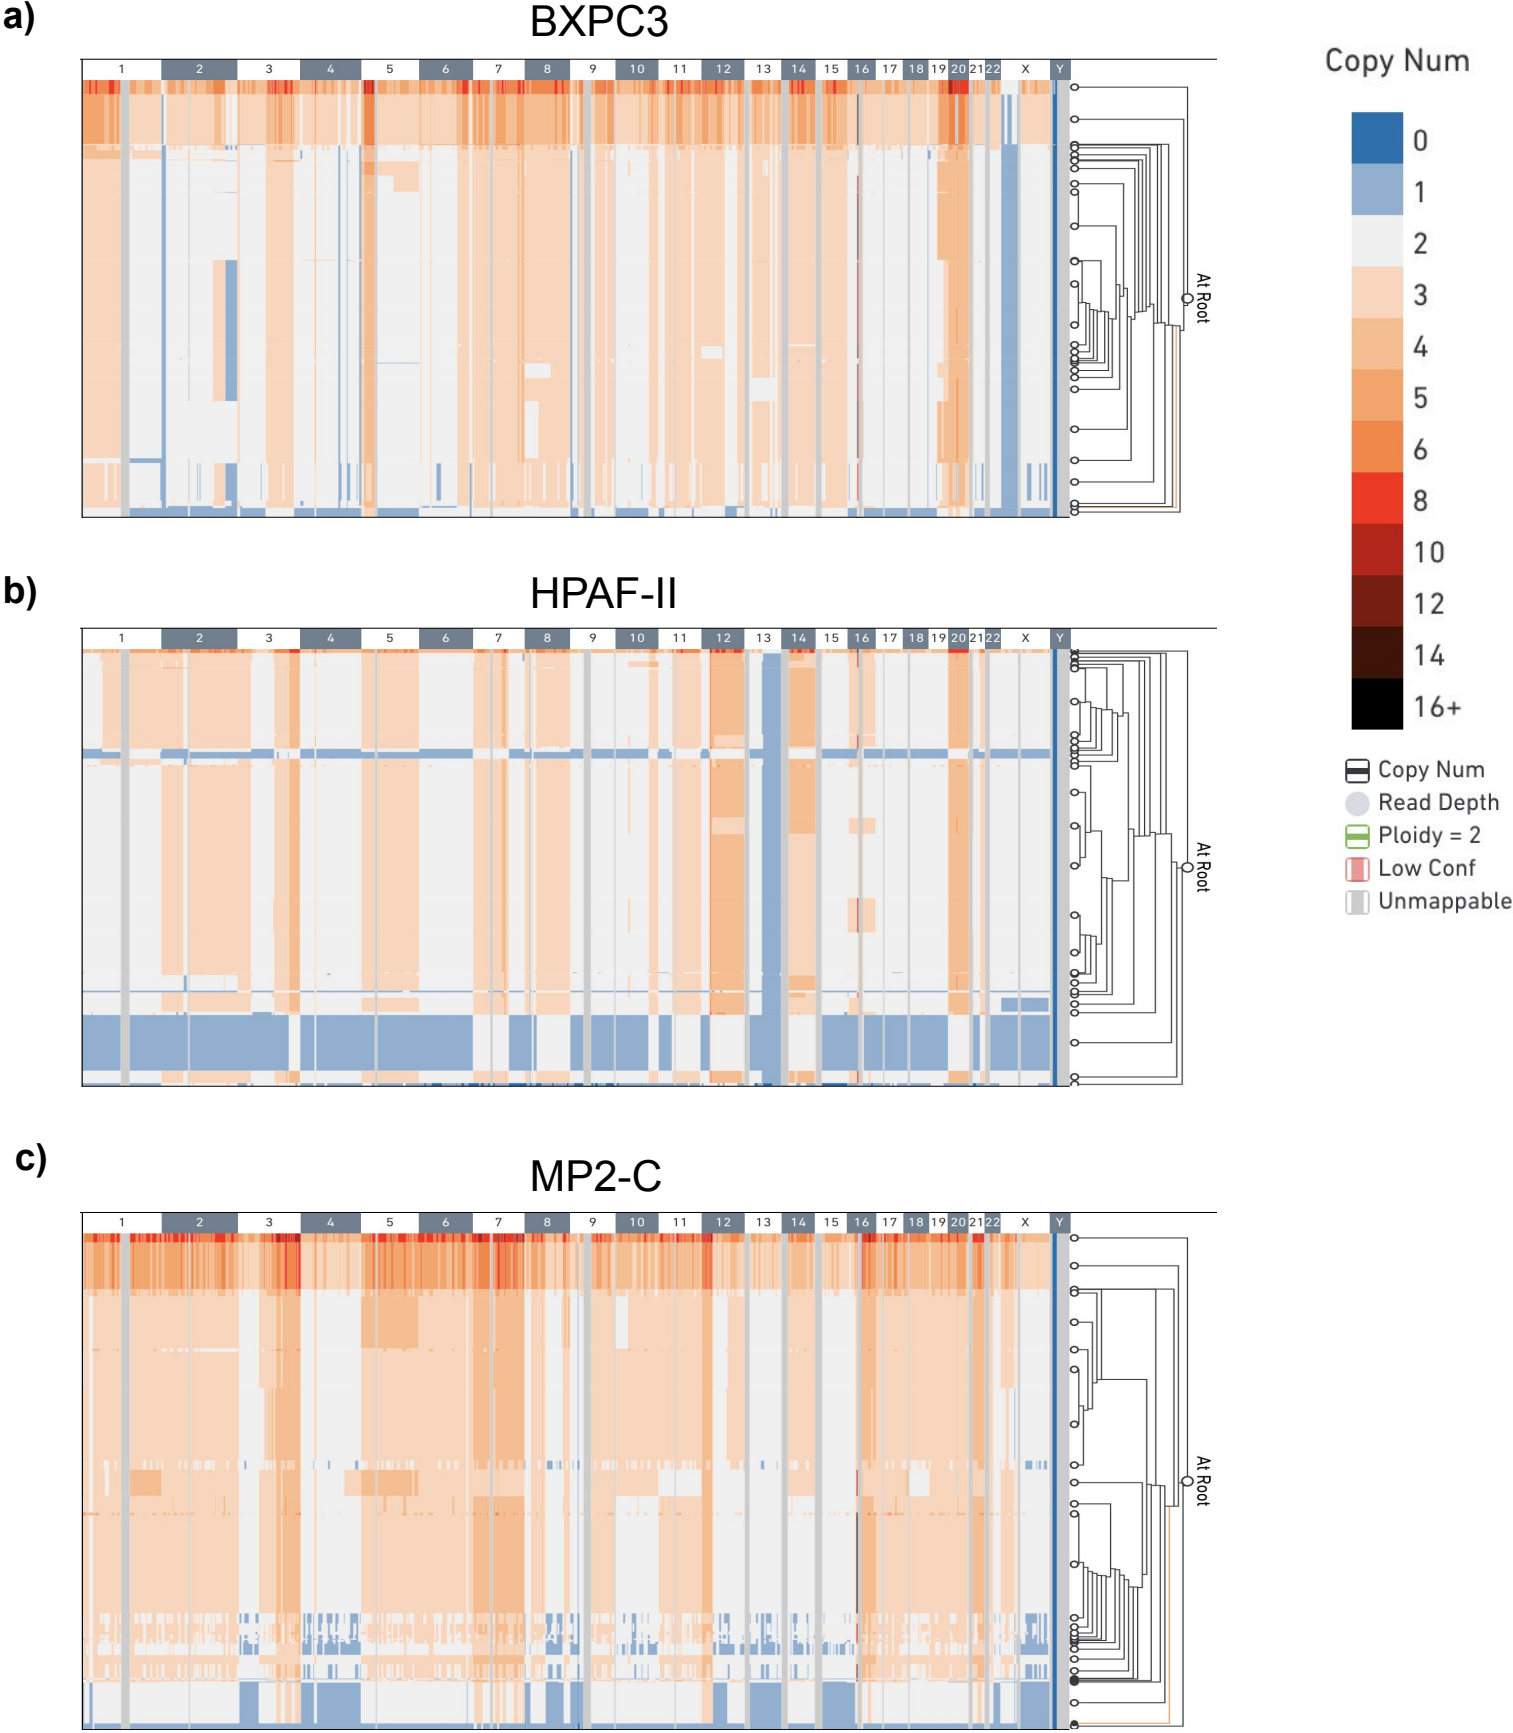

**Supplementary Fig. 3) a)** Segmentation plotting derived from normalized copy number ratios of scCNV clones from each cell line. Columns indicate chromosomes, rows indicate ploidy ratio.

a)

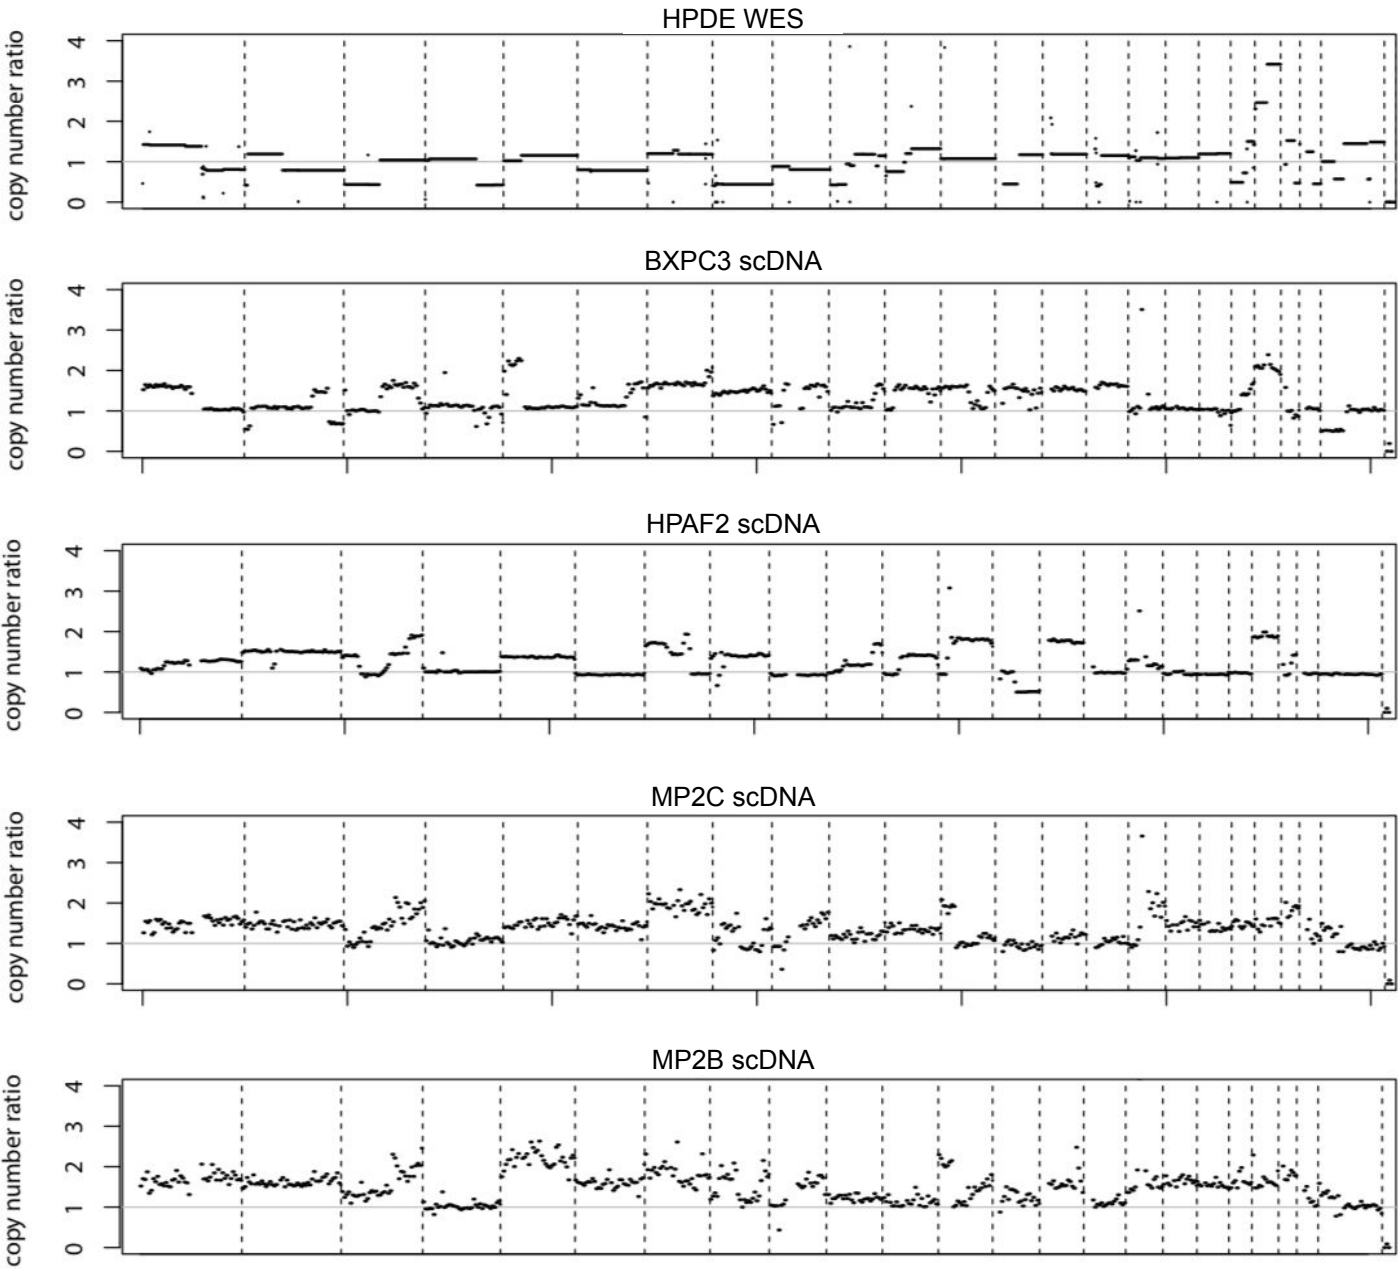

**Supplementary Fig. 4) PDAC cell lines harbor differential CNV events at oncogenic loci.**

Heatmap with copy number per cell (rows) per gene (columns) for a series of known oncogenes, for (a) HPNE cells and (b) all non-HPNE cell lines with scCNV profiled. Showing a random subset (1000) of cells per cell line.

a)

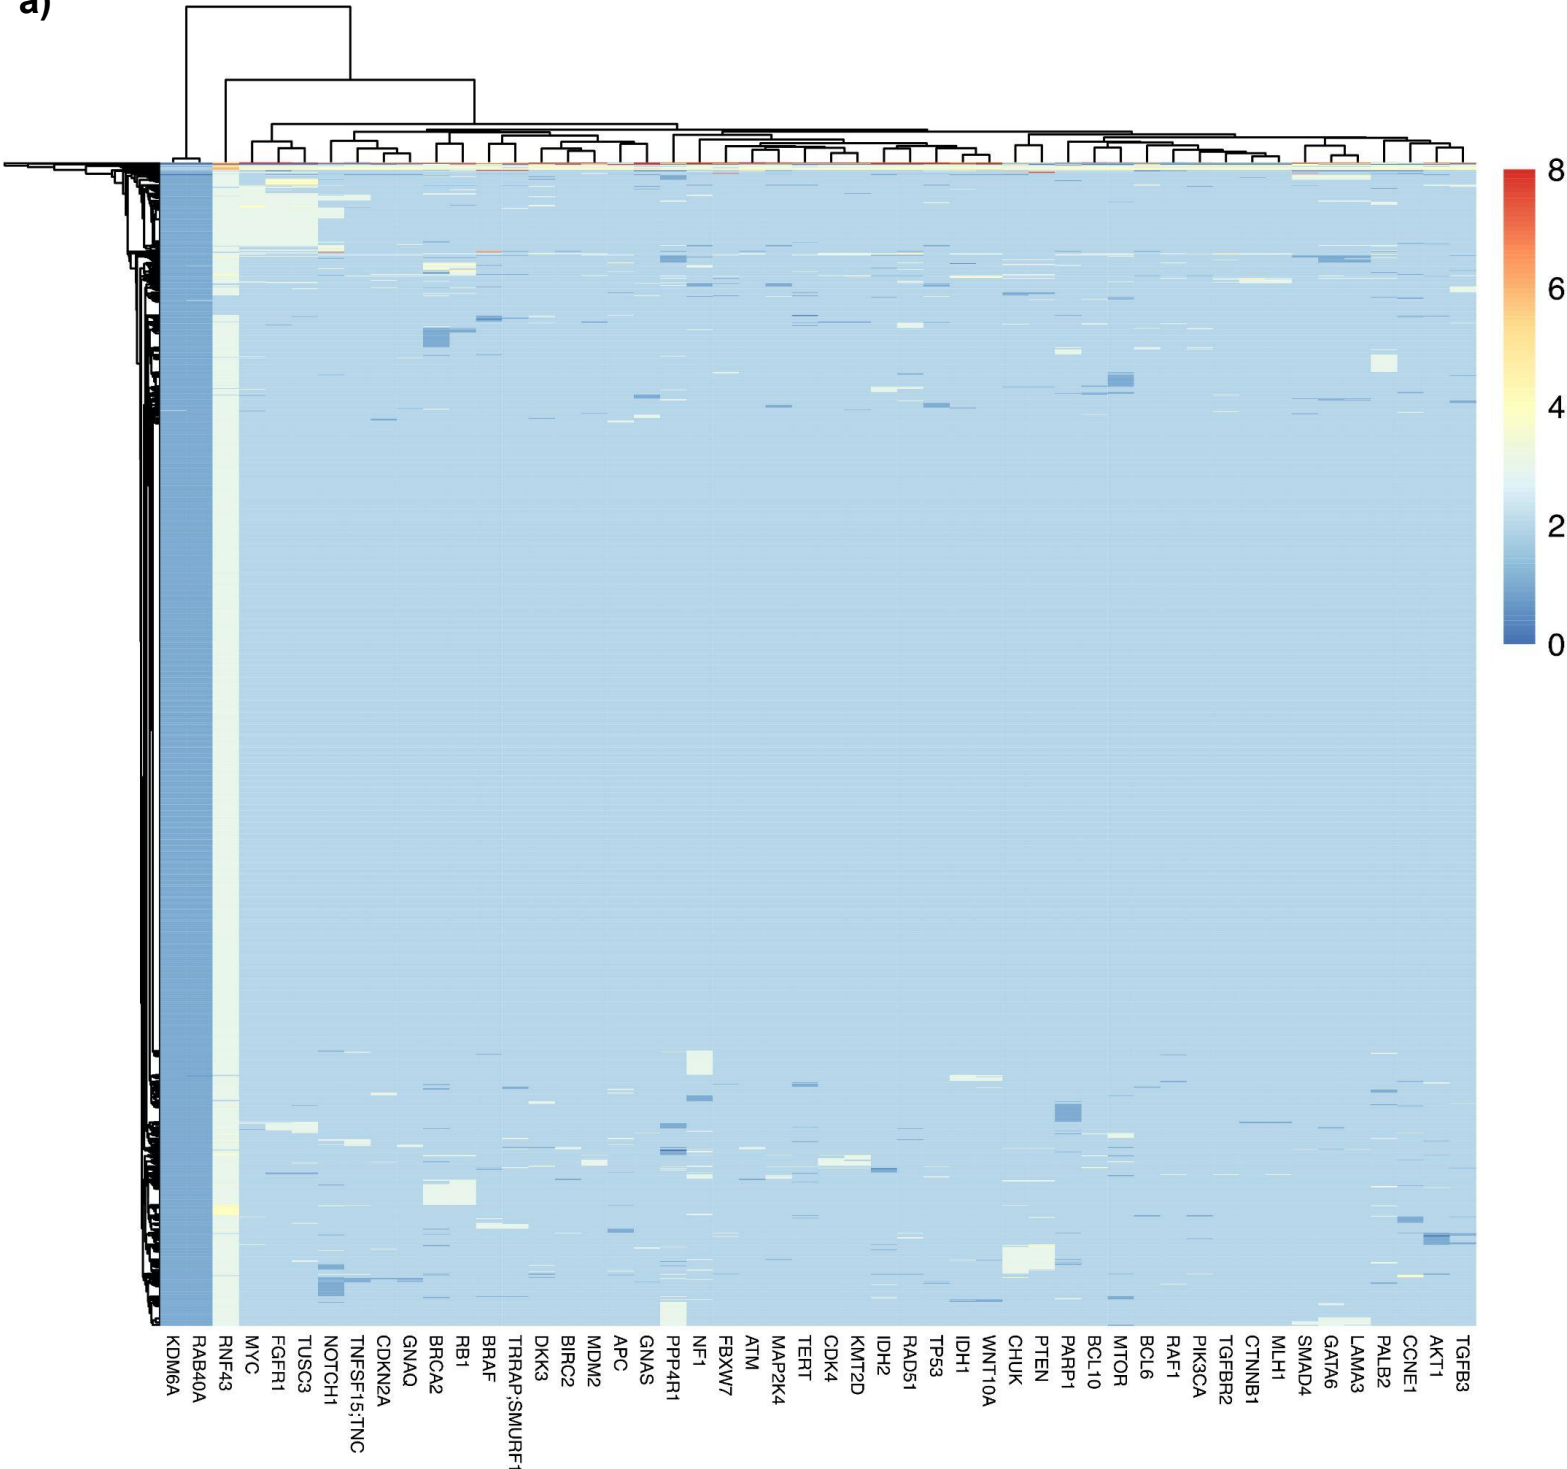

Supplementary Fig. 4, continued.

b)

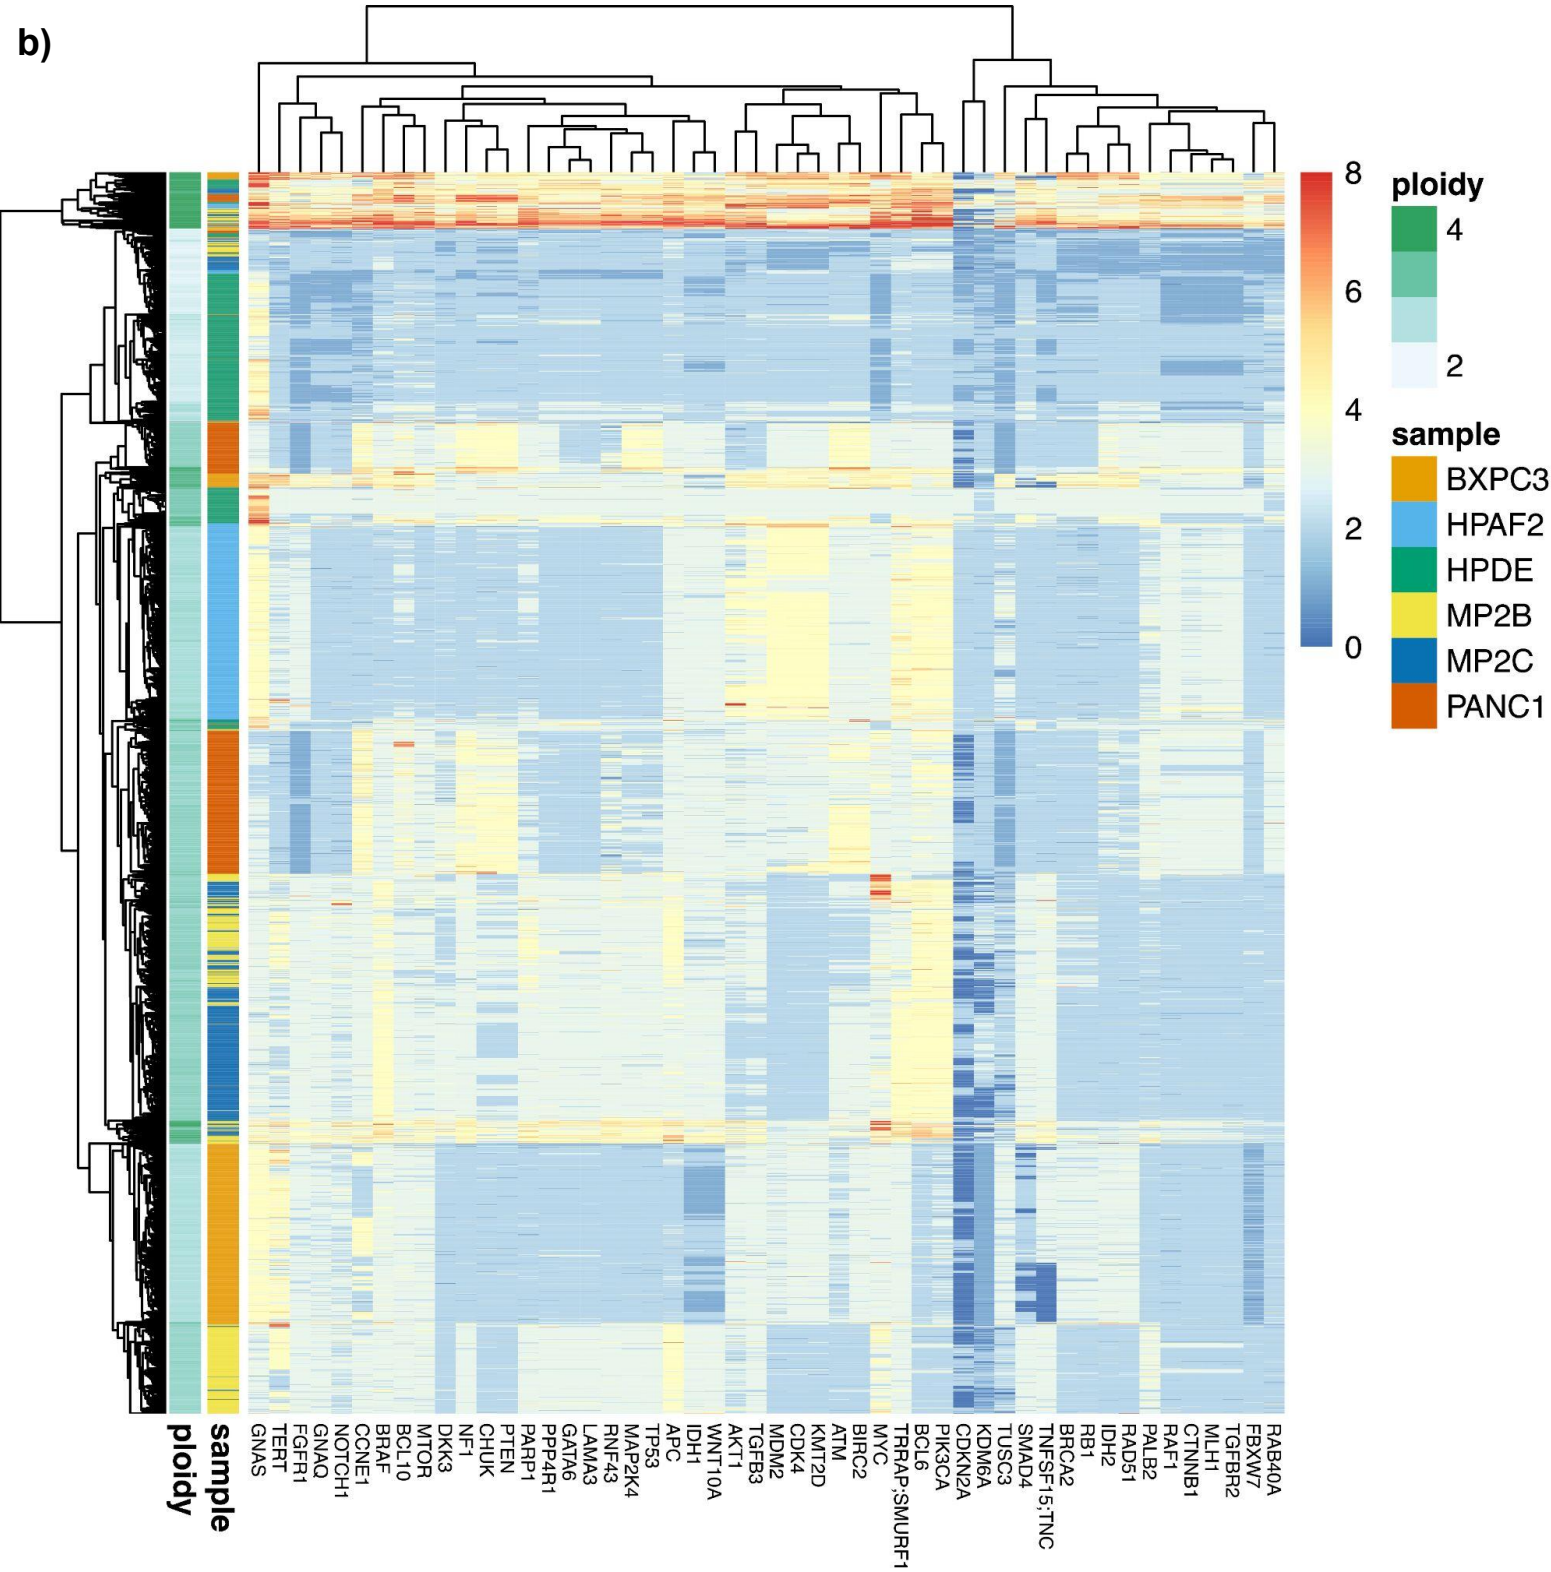

### Supplementary Fig. 5) FISH validation of select scCNV amplifications.

a) FISH validation of amplifications of AURKA (green) and TERT (red) in HPNE, HPAF-II, BxPC3 and HPDE cell lines, corroborating reported scCNV findings of amplification events at these loci. Two-tailed P values determined using Mann Whitney tests for pairwise comparisons in Prism 9 (v9.0.0). For TERT: HPNE-HPDE pval < 0.0001, HPAF2-HPNE pval = 0.4076, BXPC3-HPNE pval < 0.0001. For AURKA: HPNE-HPDE pval < 0.0001, HPAF2-HPNE pval < 0.0001, BXPC3-HPNE pval < 0.0001. Scale bar = 5 microns.

a)

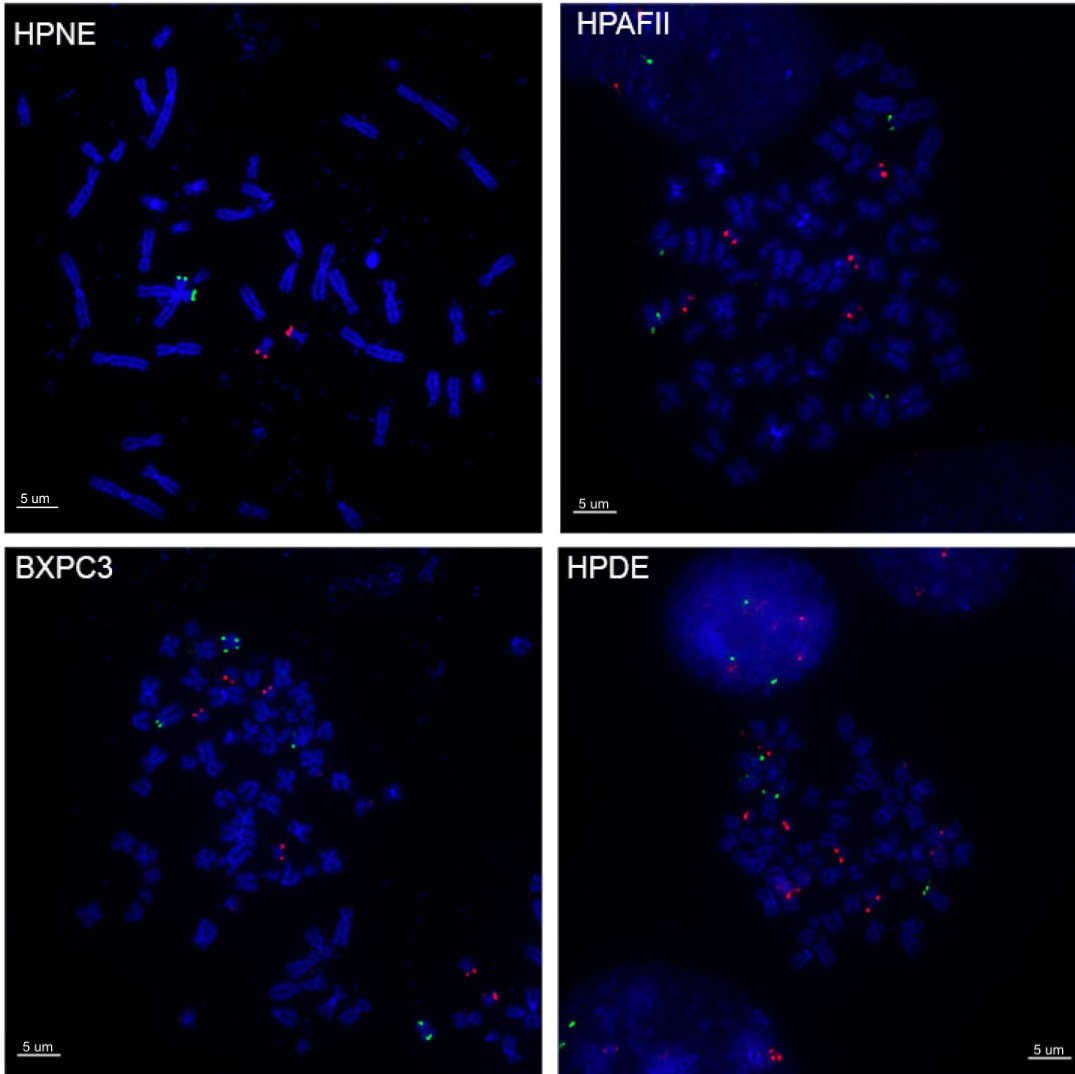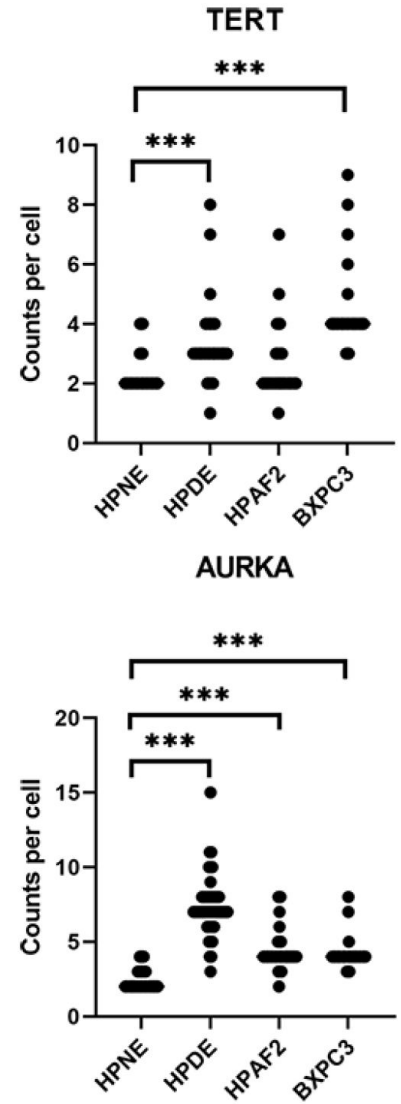

**Supplementary Fig. 6) Hotspot KRAS mutations confirmed in PDAC cell lines.** Droplet Digital PCR (ddPCR) results of KRAS probes for hotspot mutations G12C, G12D, and G12V applied to MP2 samples A-C and Panc1. **a-c)** Confirms same KRAS G12C mutation in all 3 cell lines. **d)** Panc1 ddPCR results indicating both KRAS G12D mutation.

**a) MP2\_A**

G12C

G12D

G12V

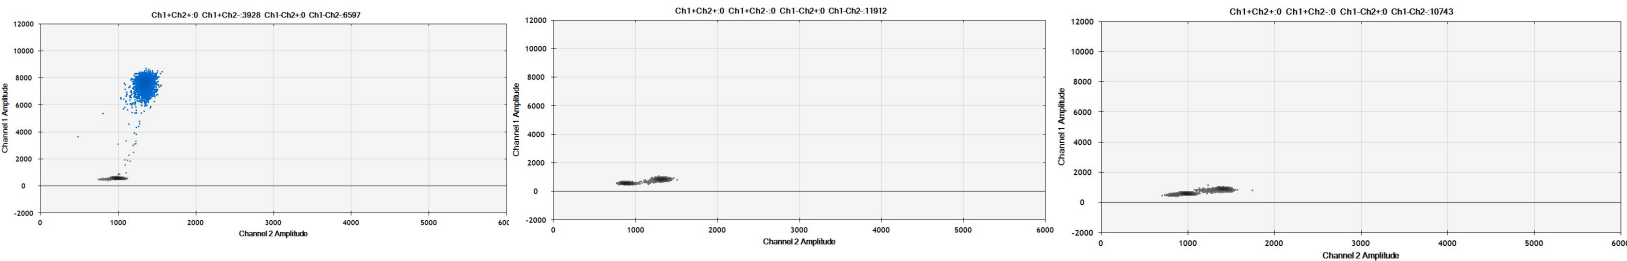

**b) MP2\_B**

G12C

G12D

G12V

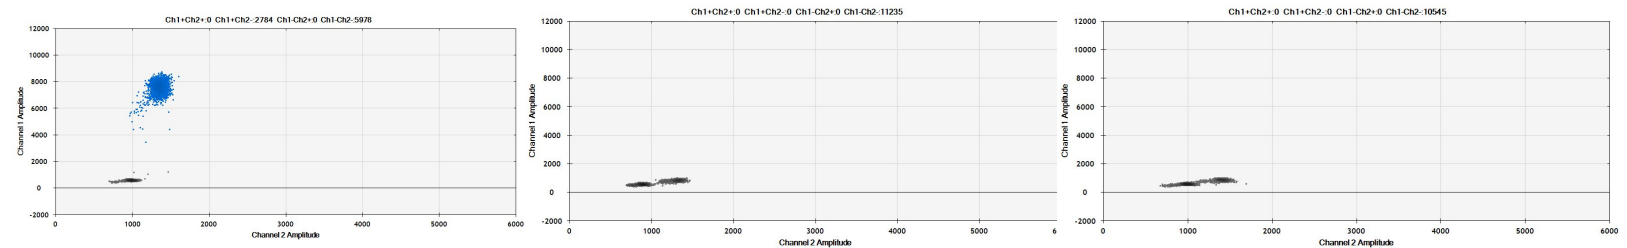

**c) MP2\_C**

G12C

G12D

G12V

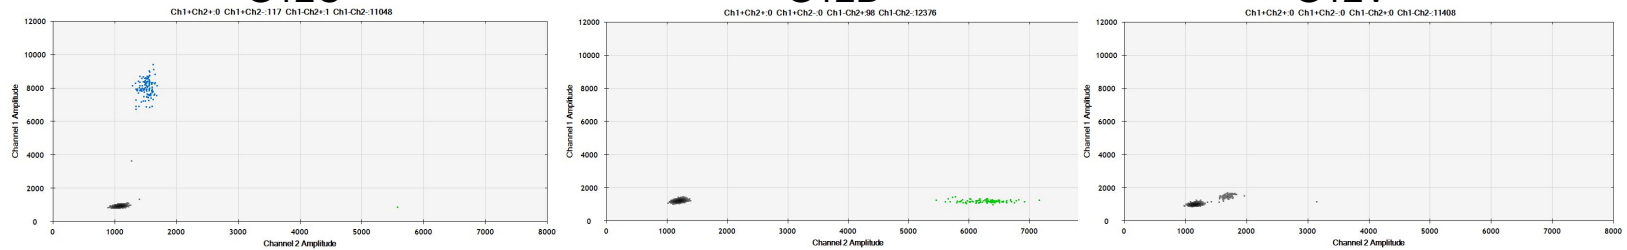

**d) Panc1**

G12C

G12D

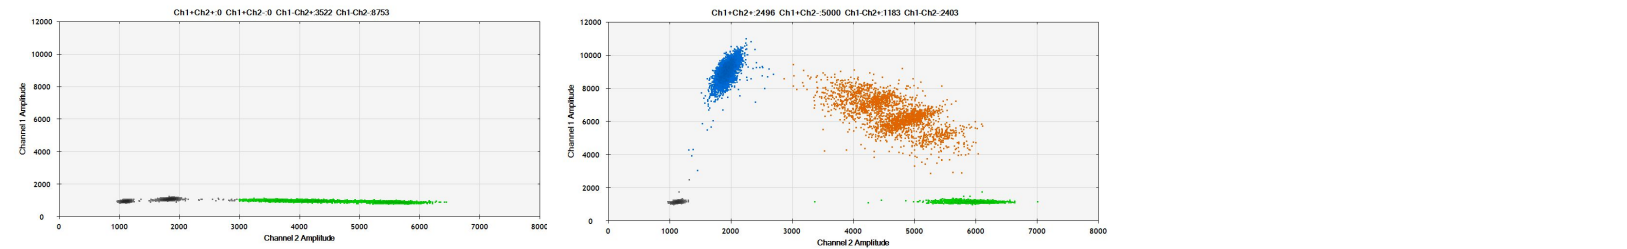

**Supplementary Table 1.** Summary of GSEA results on gene lists derived from scCNV clones, which were analyzed with clonealign and subsequently mapped to scRNAseq data. CNV\_events describe the major amplification or deletion events that were common to groups of cells per sample, and therefore used to define clonal families by clonealign. Cell\_count depicts the number of cells harboring a set of CNV events. Hallmark\_enriched and Oncogenic\_enriched list gene set pathways that were enriched in scRNAseq clusters corresponding to scCNV-defined clones.

| CNV_clone                  | CNV_events                                                                                       | cell_count | Hallmark_enriched                                                                                                                                      | Oncogenic_enriched                                                                                                                                                                              |
|----------------------------|--------------------------------------------------------------------------------------------------|------------|--------------------------------------------------------------------------------------------------------------------------------------------------------|-------------------------------------------------------------------------------------------------------------------------------------------------------------------------------------------------|
| <b>MP2_B_C1</b>            | chr7_p.amp, chr10_p.del, chr10_q.del, chr12_q_subseg.neu                                         | 1096       | MYC, Glycolysis, Oxidative Phosphorylation, E2F                                                                                                        | LEF1, P53, Cyclin D1                                                                                                                                                                            |
| <b>MP2_B_C2</b>            | chr7_p.neu, chr10_p.neu, chr10_q.neu, chr12_q_subseg.del                                         | 813        | TNFA, UV Response, Apical Junction, KRAS, MTORC1, Unfolded Protein Response                                                                            | MTOR, EIF4E, RAF, NEF2L2                                                                                                                                                                        |
| <b>MP2_C_C1 + MP2_C_C3</b> | chr5.amp, chr10_p.del, chr10_q.neu, chr14_q.neu; chr5.neu, chr10_p.del, chr10_q.del, chr14_q.del | 1208       | Angiogenesis, P53                                                                                                                                      | CRX, CAHOY Astroglial, ESC_V6.5, VEGF                                                                                                                                                           |
| <b>MP2_C_C2</b>            | chr5.neu, chr10.neu, chr14.neu                                                                   | 871        | N/A                                                                                                                                                    | N/A                                                                                                                                                                                             |
| <b>MP2_C_C3</b>            | chr5.neu, chr10_p.del, chr10_q.del, chr14_q.del                                                  |            | combined with clone 1 as described in Main Text                                                                                                        | N/A                                                                                                                                                                                             |
| <b>Panc1_3D_C1</b>         | chr14_q.neu, chr15_q.del                                                                         | 904        | TNFA, Estrogen Response Late + Early, Fatty Acid Met., Cholesterol Homeostasis, Coagulation, IFGamma Response, Inflammatory Response, IFAlpha Response | EGFR_UP.V1, PRC1_BMI_UP.V1, ERBB2_UP.V1, BCAT.100_UP.V1, PRC2_SUZ12_UP.V1, MEK_UP.V1, ESC_V6.5_UP_LATE, MEL18_DN.V1, CSR_EARLY_UP.V1, AKT_UP_MTOR_DN.V1, JNK_DN.V1, KRAS.DF.V1, ATF2_S_UP.V1_DN |
| <b>Panc1_3D_C2</b>         | chr14_q.del, chr15_q.neu                                                                         | 223        | N/A                                                                                                                                                    | EIF4E                                                                                                                                                                                           |
| <b>Panc1_2D_C1</b>         | chr14_q.neu, chr15_q.del                                                                         | 3251       | G2M, E2F Targets, Estrogen Response Late, Bile Acid Metabolism, Apoptosis, Cholesterol Homeostasis                                                     | N/A                                                                                                                                                                                             |
| <b>Panc1_2D_C2</b>         | chr14_q.del, chr15_q.neu                                                                         | 404        | N/A                                                                                                                                                    | N/A                                                                                                                                                                                             |



**Supplementary Table 2.** Per reviewer request, list of Basal and Classical genes from the Moffitt Classification schema, used in this study for scRNAseq cell stratification in cell lines and PDOs.

| <b>Moffitt Basal</b> | <b>Moffitt Classical</b> |
|----------------------|--------------------------|
| AREG                 | AGR2                     |
| CST6                 | AGR3                     |
| DHRS9                | ANXA10                   |
| FAM83A               | BTNL8                    |
| FGFBP1               | CDH17                    |
| GPR87                | CEACAM6                  |
| KRT15                | CLRN3                    |
| KRT17                | CTSE                     |
| KRT6A                | CYP3A7                   |
| KRT6C                | FAM3D                    |
| KRT7                 | KRT20                    |
| LEMD1                | LGALS4                   |
| LY6D                 | LYZ                      |
| S100A2               | MYO1A                    |
| SCEL                 | PLA2G10                  |
| SERPINB3             | REG4                     |
| SERPINB4             | SPINK4                   |
| SLC2A1               | ST6GALNAC1               |
| SPRR1B               | TFF1                     |
| SPRR3                | TFF2                     |
| TNS4                 | TFF3                     |
| UCA1                 | TSPAN8                   |
| VGLL1                | VSIG2                    |

**Supplementary Fig. 7) Expression of few genes dictates transcriptional subtyping of cell lines.** Moffitt Classification, per gene, per cell across basal and classical subtypes in **a) MP2-A**, **b) MP2-B**, and **c) MP2-C** displaying how a sparse expression of subtype genes across thousands of cells in each sample forces an artificial classification.

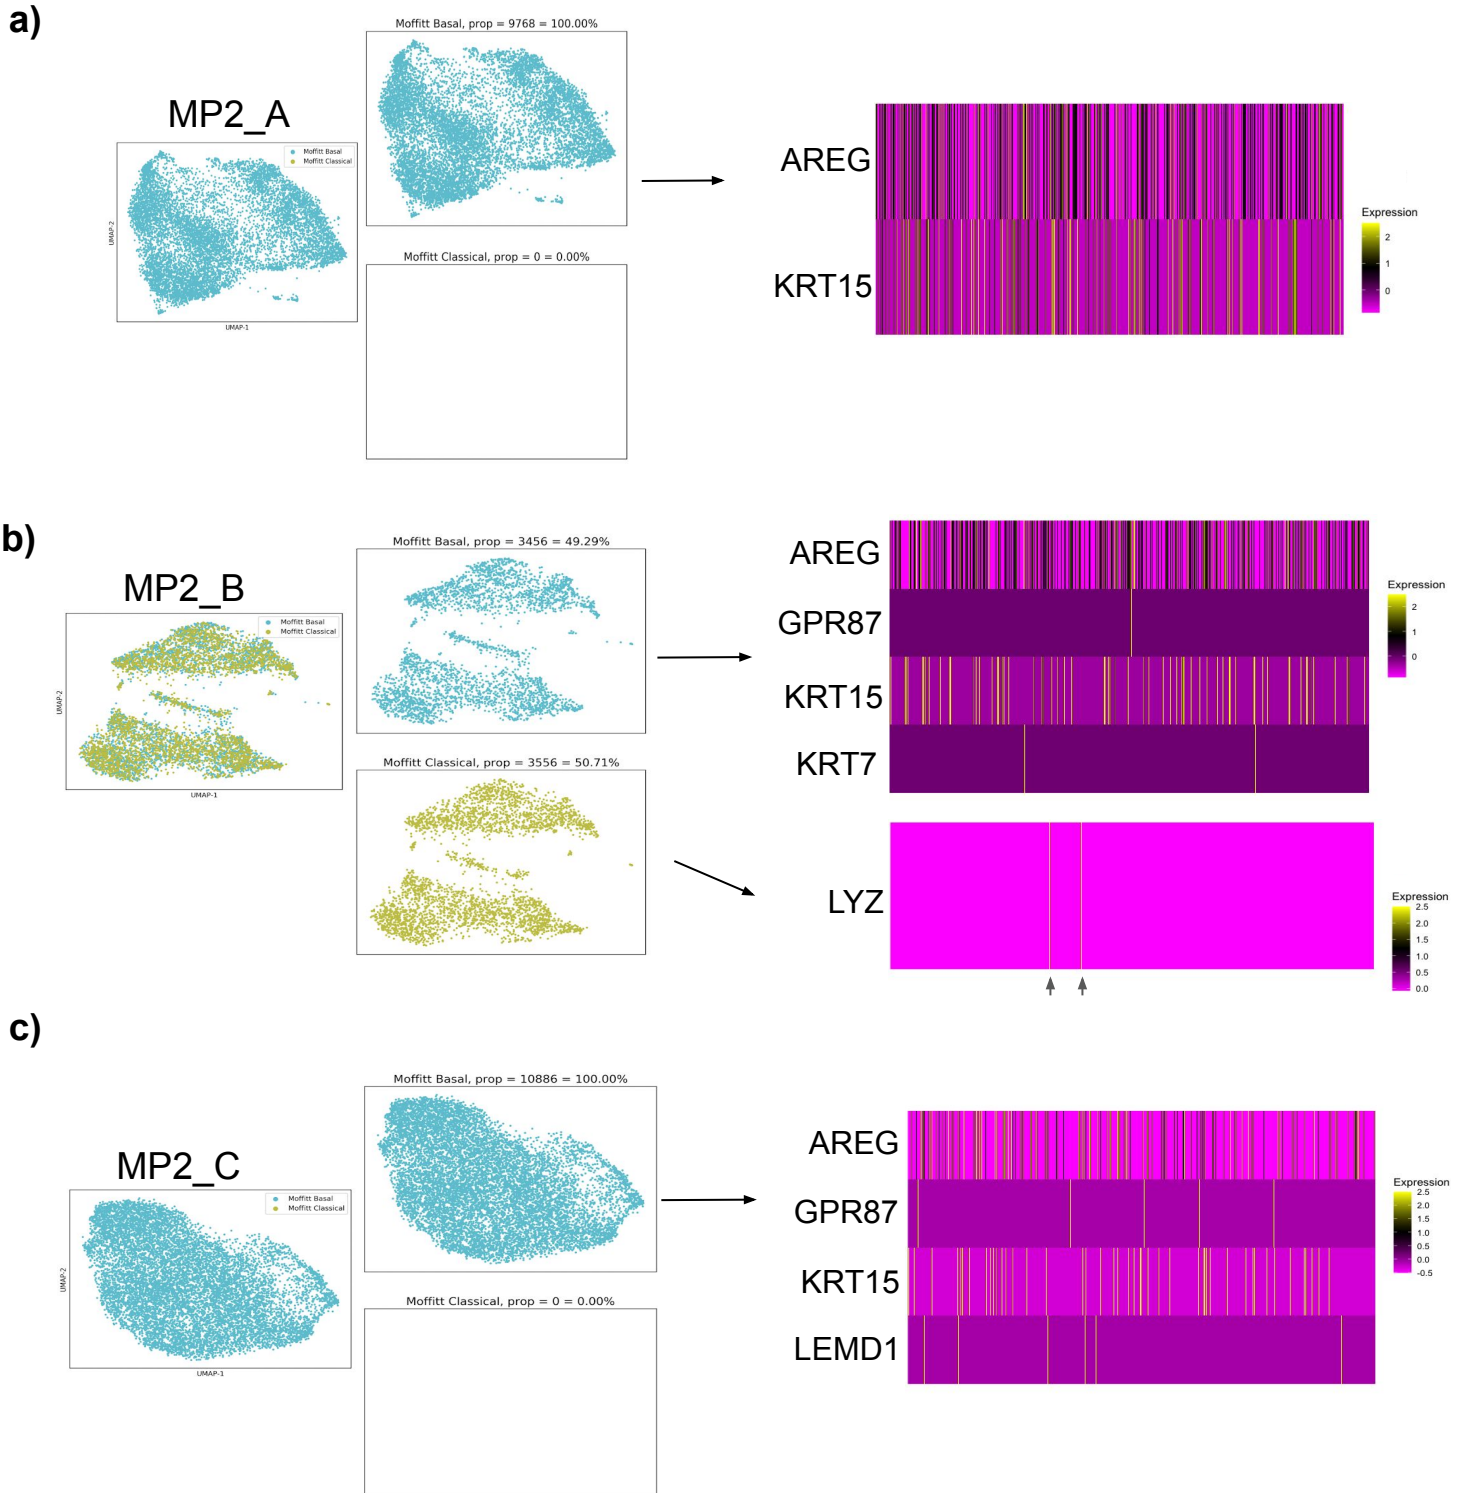

**Supplementary Table 3.** Distribution of PDAC scRNA cells across Collisson + Moffit PDAC subtypes. Cell Count / Percentage of total.

| Cell Line | Moffitt- Basal | Moffitt- Classical | Collisson- Classical | Collisson- Exocrine | Collisson- Quasimesenchymal |
|-----------|----------------|--------------------|----------------------|---------------------|-----------------------------|
| MP2-A     | 9768 / 100%    | 0 / 0%             | 0 / 0%               | 0 / 0%              | 5420 / 55.49%               |
| MP2-B     | 3456 / 49.29%  | 3556 / 50.71%      | 2408 / 34.34%        | 1896 / 27.04%       | 2708 / 38.62%               |
| MP2-C     | 10886 / 100%   | 0 / 0%             | 3276 / 30.09%        | 3724 / 34.21%       | 3886 / 35.70%               |
| BXPC3     | 5606 / 54.88%  | 4609 / 45.12%      | 3532 / 34.58%        | 2175 / 21.29%       | 4508 / 44.13%               |
| HPAF-II   | 2367 / 51.27%  | 2250 / 48.73%      | 1777 / 38.49%        | 961 / 20.81%        | 1879 / 40.70%               |
| HPDE      | 2879 / 55.41%  | 2317 / 44.59%      | 1594 / 30.68%        | 1479 / 2.46%        | 2123 / 40.86%               |
| HPNE      | 6318 / 49.80%  | 6370 / 50.20%      | 518 / 4.08%          | 5221 / 41.15%       | 6949 / 54.77%               |
| Panc1-3D  | 7440 / 51.03%  | 7139 / 48.97%      | 4883 / 33.49%        | 3537 / 24.26%       | 6159 / 42.25%               |
| Panc1-2D  | 2891 / 53.76%  | 2487 / 46.24%      | 1671 / 31.07%        | 1331 / 24.75%       | 2376 / 44.18%               |

**Supplementary Fig. 8) Genome-transcriptome mapping from parental Panc1 scCNVseq yields differential expression profiles between monolayer and spheroids.** a) Clonealign results using the same genomic scCNV background. Clones demarcated by CNV events at chromosomes 14q and 15q. Cells per clonal group are along the x-axis, y-axis indicates CNV events used for subsetting clones. b) Clonealign scCNV clone correspondence to Panc1 2D scRNA data. c) UMAP of scCNV-derived clones mapped to corresponding scRNA-derived cells for Panc1 2D and d) Panc1 3D. e) inferCNV derived from scRNAseq of Panc1 2D and Panc1 3D, HPNE as reference. Black box depicts differential chr15 deletion, corroborating clonealign findings for scCNV-based clone designations.

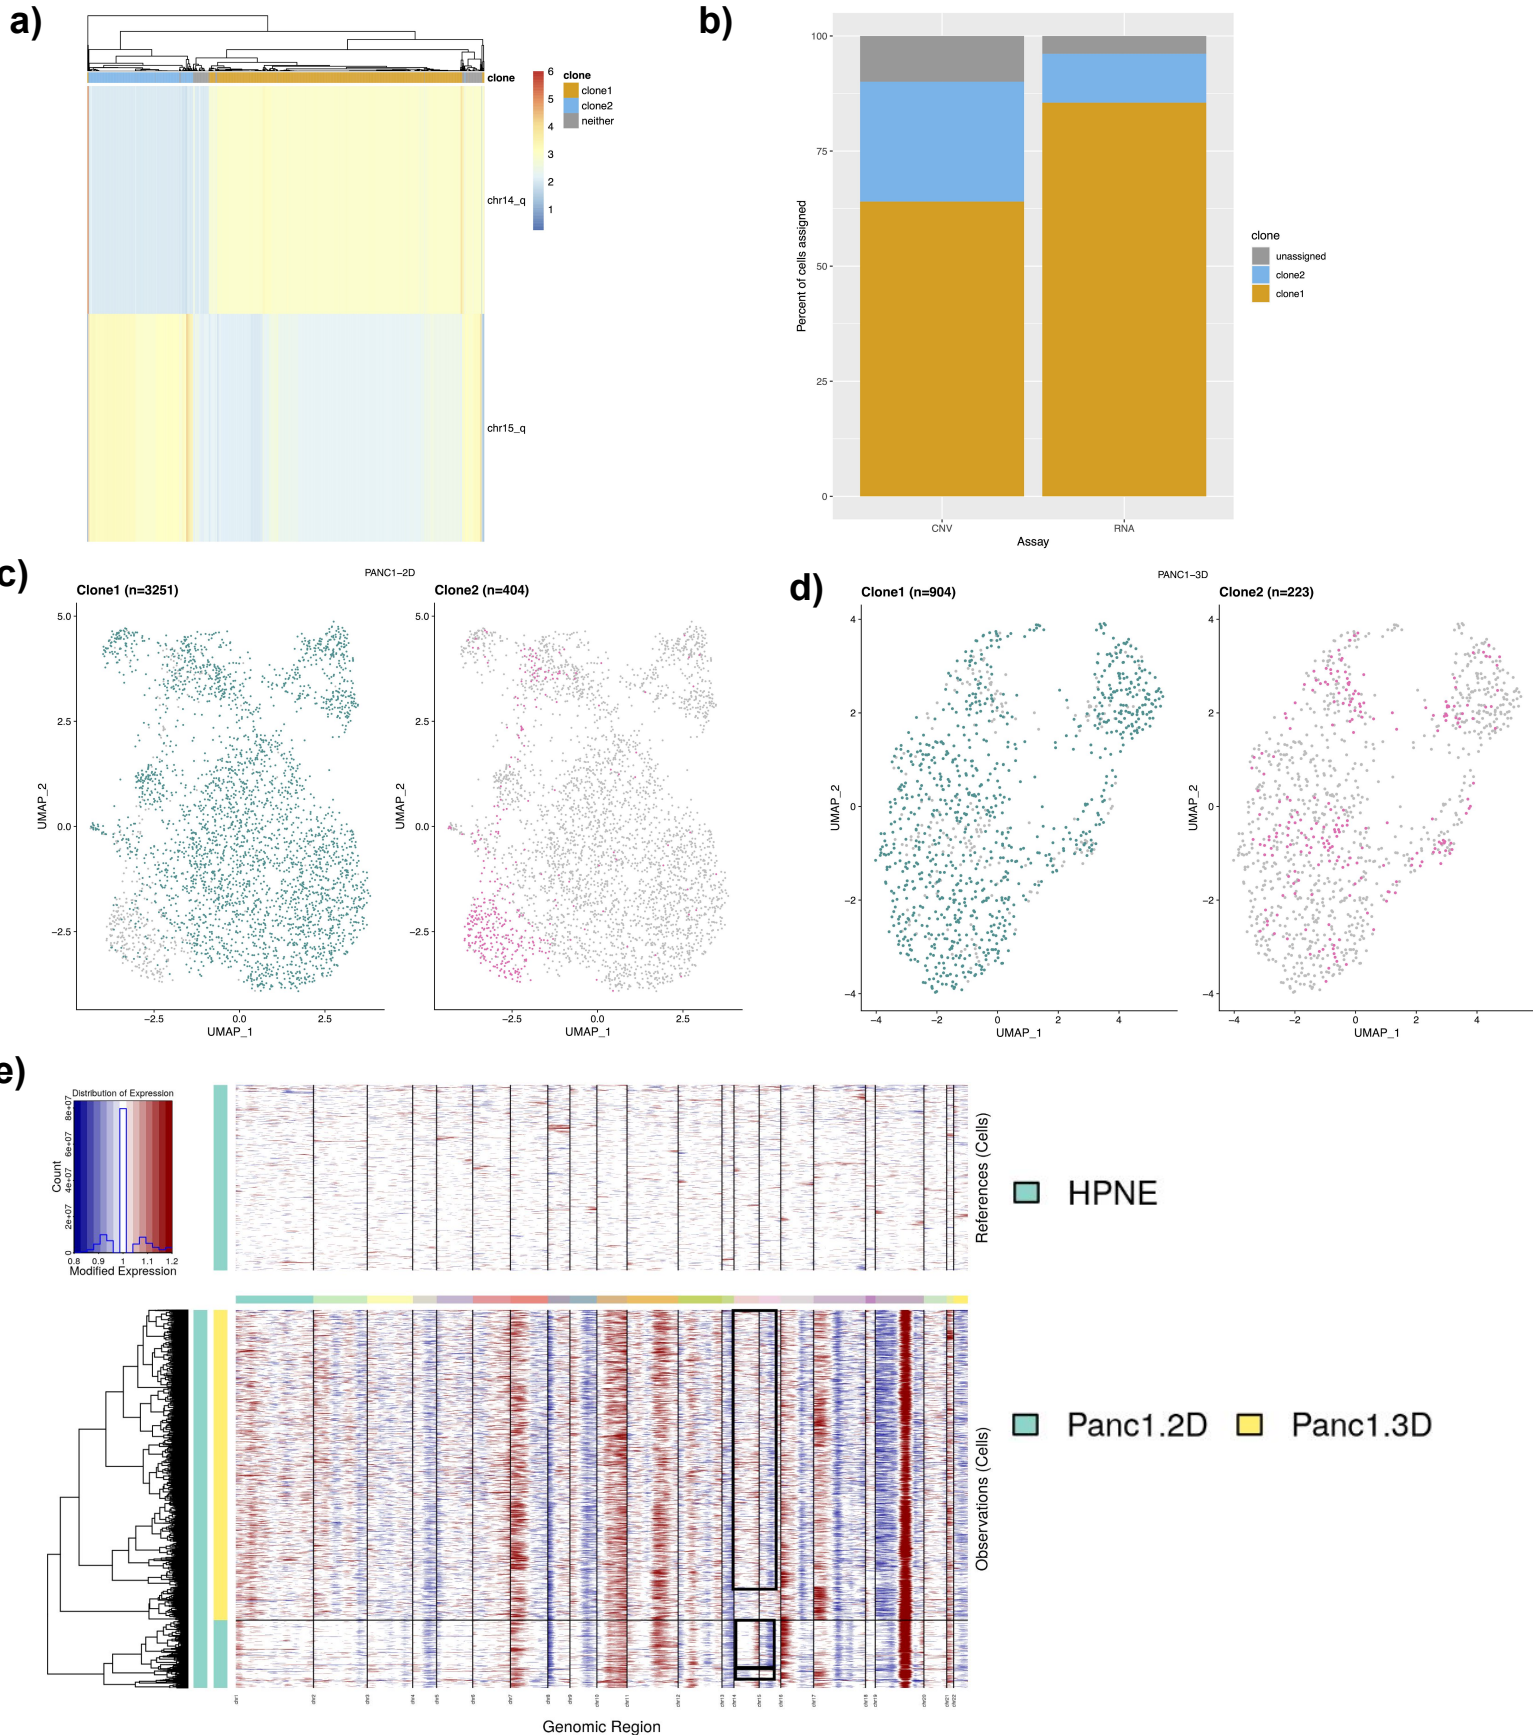

**Supplementary Fig. 9) Chromatin modifications have transcriptional consequences in spheroid model.** Quality-control metrics for single nuclei sequenced and analyzed for **(a)** Panc1 spheroids and **(b)** Panc1 monolayer samples. **(c)** Individual analysis of Panc1 spheroid nuclei shows 3 predominating states of chromatin architecture (clusters 0-2) that correspond to unique enrichment patterns. **(d)** Clusters 0 and 1 of Panc1 spheroid nuclei are enriched for SP motifs, NRF1, YY2, ZBTB33, and KLF14. **(e)** Cluster 2 of Panc1 spheroid nuclei is enriched for FOS/Jun motifs. **(f)** Individual analysis of Panc1 2D (monolayer) nuclei shows 2 predominating states of chromatin architecture (clusters 1, 2) that correspond to unique enrichment patterns. **(g)** Cluster 1 of Panc1 monolayer nuclei is enriched for Fos/Jun motifs, ZBED1, CENPB, CLOCK, and BHLHE22. **(h)** Cluster 2 of Panc1 monolayer nuclei is enriched for MYBL1, GBX1, BARX1, VENTX, T, and OTX1.

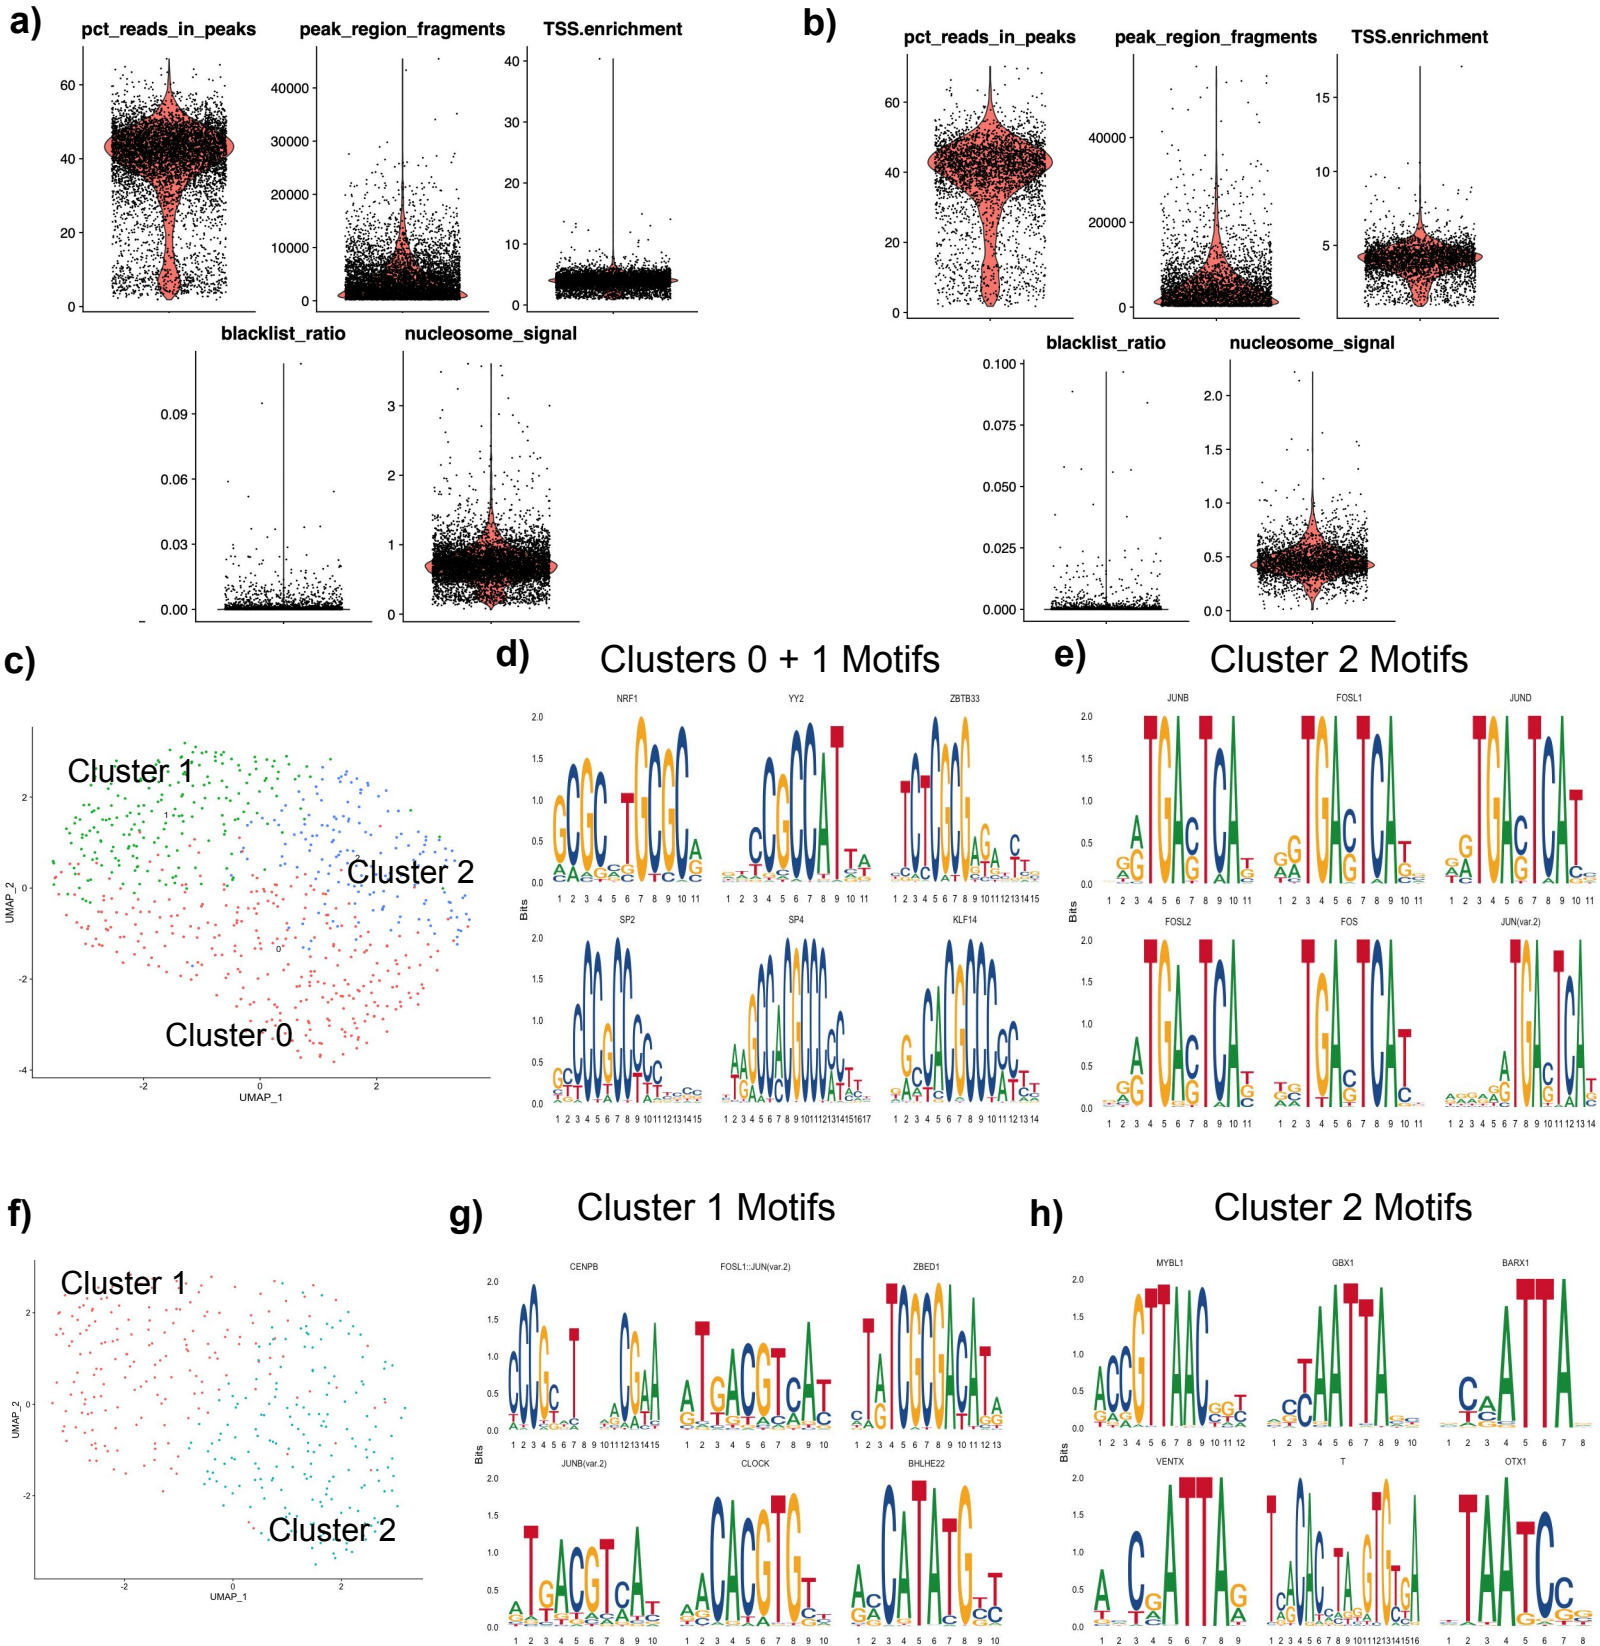

### Supplementary Fig. 10) PDO evolves towards molecular subtype admixture over time. a)

Heatmap annotated per cell in Early versus Late PDO culture (columns) and genes (rows) associated with Moffitt Classical and Basal molecular subtypes. PDO1 early expresses genes almost exclusively associated with the Basal Subtype, while many cells within PDO1 late express genes that are either classical or basal in nature.

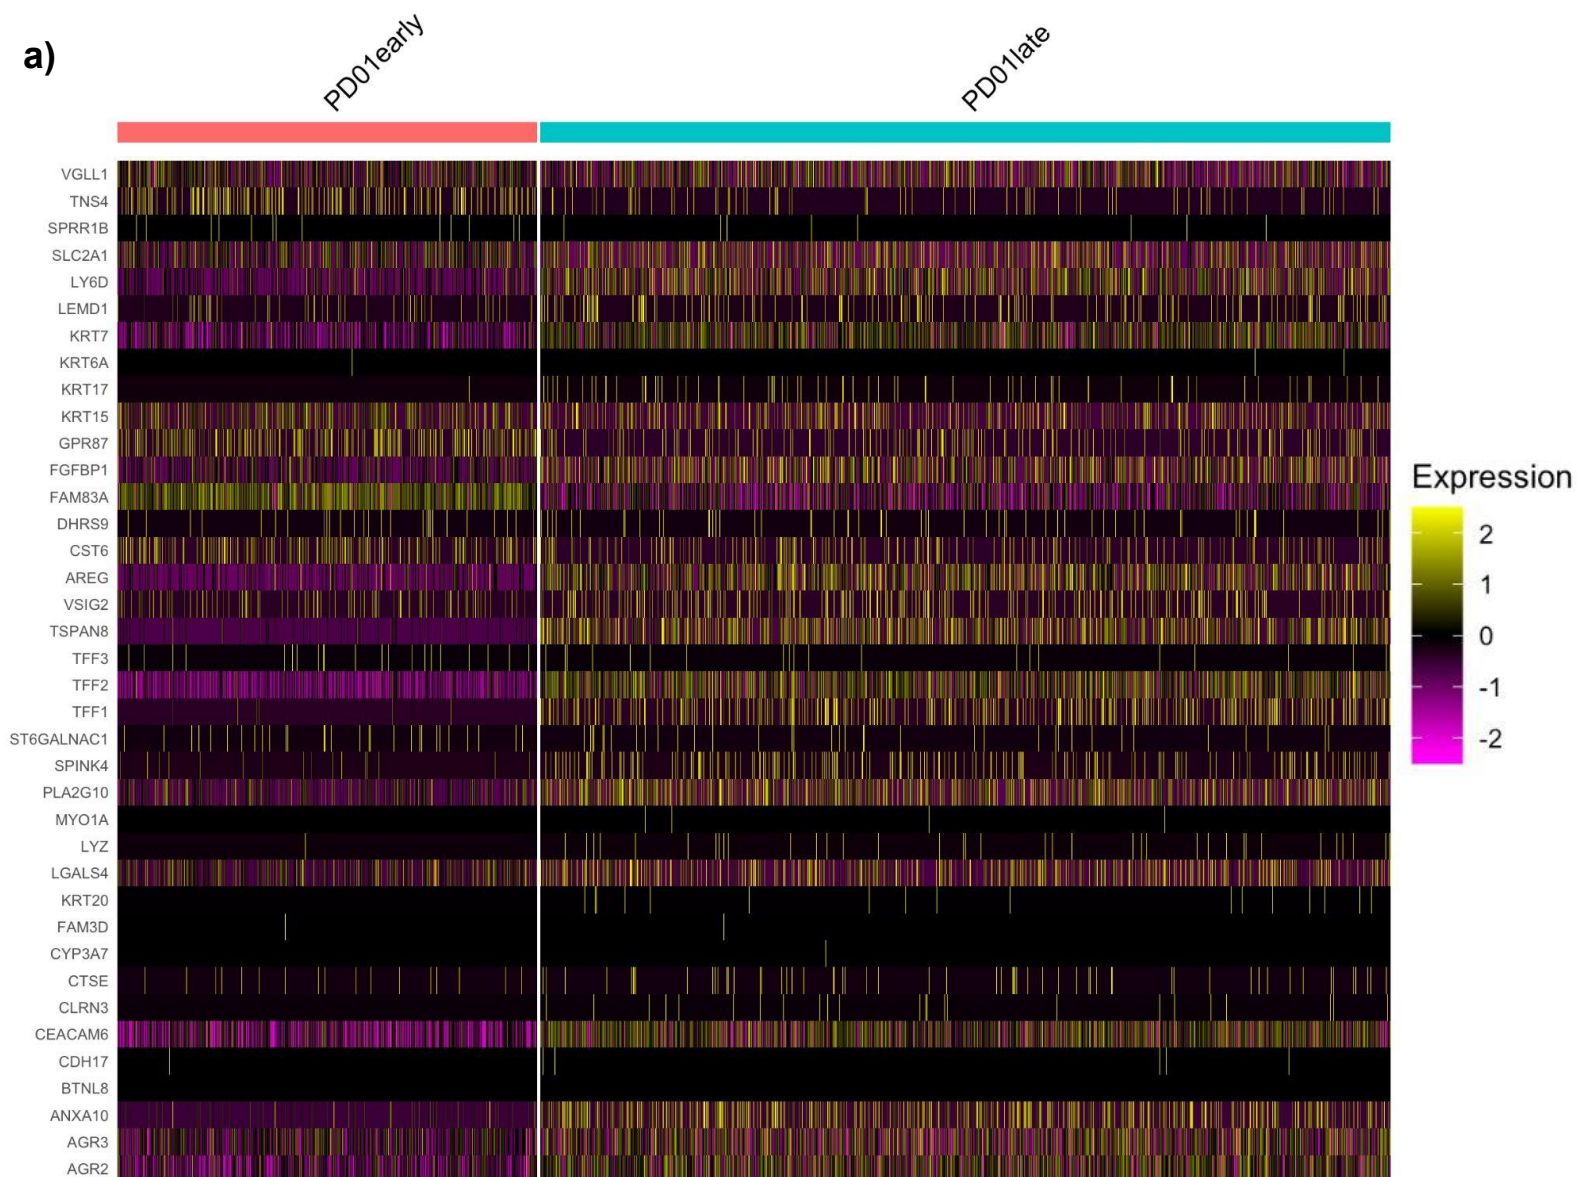

Supplement: 41467_2022_31376_MOESM1_ESM.pdf [file 41467_2022_31376_MOESM1_ESM.pdf]
